# Supplementary material
Source: PubMed Central journal article supplement (PMC6616261)

**Supplementary material**  
**for**  
**Impact of Acquired del(17p) in Multiple Myeloma**

| <b>Supplementary Table 1. Initial treatment in patients with acquired del(17p) and controls</b>                                 |                                 |                         |           |
|---------------------------------------------------------------------------------------------------------------------------------|---------------------------------|-------------------------|-----------|
| <i>Therapeutic regimen</i>                                                                                                      | <i>Acquired del(17p) (n=76)</i> | <i>Controls (n=152)</i> | <i>P*</i> |
| • PI-containing induction                                                                                                       | 21 (27.6)                       | 37 (24.3)               | 0.751     |
| ○ PI+IMiD-based                                                                                                                 | 5 (6.6)                         | 17 (11.1)               | 0.345     |
| ○ PI-based                                                                                                                      | 16 (21.1)                       | 20 (13.2)               |           |
| • IMiD-based induction                                                                                                          | 47 (61.8)                       | 95 (62.5)               |           |
| • Other induction                                                                                                               | 8 (10.5)                        | 20 (13.2)               |           |
| • Alkylating agent as part of induction                                                                                         | 17 (22.4)                       | 34 (22.4)               | 1.000     |
| SCT within 1 year of diagnosis                                                                                                  | 34 (44.7)                       | 82 (53.9)               | 0.208     |
| SCT within 1 year of diagnosis (and before detection of del(17p) for cases)                                                     | 33 (43.4)                       | 82 (53.9)               | 0.160     |
| *P for Fisher's exact test. IMiD indicates Immunomodulatory drug; PI, Proteasome inhibitor; and SCT, stem cell transplantation. |                                 |                         |           |

**Supplementary Table 2. Best response to induction therapy in patients with acquired del(17p) and controls**

| <i>Best response to therapy</i> | Acquired (17p)<br>(n=69) | Controls (n=151) | <i>p</i> * |
|---------------------------------|--------------------------|------------------|------------|
| sCR+CR+VGPR                     | 24 (34.8)                | 40 (26.4)        | 0.263      |
| sCR+CR+VGPR+PR (ORR)            | 57 (82.6)                | 126 (83.4)       | 0.849      |
| sCR+CR+VGPR+PR+MR (CBR)         | 62 (89.9)                | 143 (94.7)       | 0.247      |
| sCR                             | 2 (2.9)                  | 4 (2.6)          |            |
| CR                              | 3 (4.4)                  | 7 (4.6)          |            |
| VGPR                            | 19 (27.5)                | 29 (19.2)        |            |
| PR                              | 33 (47.8)                | 86 (57.0)        |            |
| MR                              | 5 (7.3)                  | 17 (11.3)        |            |
| SD                              | 7 (10.1)                 | 6 (4.0)          |            |
| PD                              | 0 (0)                    | 2 (1.3)          |            |

Sixty nine patients with acquired del(17p) and 151 controls were evaluable for response; \*P for Fisher's exact test. CBR indicates clinical benefit rate; CR, complete response; MR, minimal response; ORR, overall response rate; PD: progressive disease; PR, partial response; sCR: stringent CR; SD: stable disease; and VGPR, very good partial response.

**Supplementary Table 3. Sub-group analysis for overall survival landmarked from detection of del(17p) in patients based on prognostic factors at diagnosis and therapy.**

| <i>Subgroups for analysis</i>                                           | <i>Acquired del(17p) (n=76)</i> | <i>Control patients (n=152)</i> | <i>p*</i> |
|-------------------------------------------------------------------------|---------------------------------|---------------------------------|-----------|
| Age <65 (48 vs. 101)                                                    | 22.3 (13.4-37.2)                | 56.2 (42.3-80.1)                | <0.001    |
| Age ≥65 (28 vs. 51)                                                     | 11.8 (4.2-18.2)                 | 51.2 (40.8-88.4)                | <0.001    |
|                                                                         |                                 |                                 |           |
| No high-risk translocation (62 vs. 138)                                 | 18.8 (11.9-25.0)                | 69.1 (44.8-86.5)                | <0.001    |
| High-risk translocation (14 vs. 14)                                     | 15.8 (3.8-65.8)                 | 44.4 (25.0-50.0)                | 0.259     |
|                                                                         |                                 |                                 |           |
| ISS I/II (42 vs. 110)                                                   | 16.5 (11.2-37.2)                | 69.1 (45.7-80.1)                | <0.001    |
| ISS III (14 vs. 26)                                                     | 9.7 (1.7-43.7)                  | 40.7 (26.0-NR)                  | 0.026     |
|                                                                         |                                 |                                 |           |
| Low LDH (44 vs. 116)                                                    | 17.7 (8.6-43.7)                 | 56.2 (44.4-78.8)                | <0.001    |
| High LDH (7 vs. 5)                                                      | 11.2 (2.2-29.8)                 | 37.8 (0-NR)                     | 0.090     |
|                                                                         |                                 |                                 |           |
| Low PC proliferative rate (32 vs. 84)                                   | 22.7 (11.7-48.0)                | 54.0 (44.4-88.4)                | 0.003     |
| High PC proliferative rate (14 vs. 22)                                  | 8.9 (4.2-43.7)                  | 72.8 (38.4-NR)                  | 0.001     |
|                                                                         |                                 |                                 |           |
| PI-containing induction (21 vs. 37)                                     | 10.9 (5.8-20.0)                 | 53.8 (40.0-78.8)                | <0.001    |
| Others (55 vs. 115)                                                     | 22.3 (13.4-41.0)                | 54.0 (42.3-80.1)                | <0.001    |
|                                                                         |                                 |                                 |           |
| Early SCT (and before detection of del(17p) for cases) (33 vs. 82)      | 17.1 (12.7-29.8)                | 59.7 (44.8-NR)                  | <0.001    |
| Delayed or no SCT (or after detection of del(17p) for cases)(43 vs. 70) | 18.2 (8.3- 35.6)                | 45.7 (38.3-80.1)                | <0.001    |

\*P for log-rank test for Kaplan Meier analysis; ISS indicates international staging system; LDH, Lactate dehydrogenase; PC, Plasma cell; and PI, Proteasome inhibitor.

| <b>Supplementary Table 4. Details of subsequent line of therapy in patients with acquired del(17p)<br/>(n=76)</b> |                                      |                                 |                                                                                                     |
|-------------------------------------------------------------------------------------------------------------------|--------------------------------------|---------------------------------|-----------------------------------------------------------------------------------------------------|
| <i>Serial number</i>                                                                                              | <i>Year of detection of del(17p)</i> | <i>Prior line(s) of therapy</i> | <i>Subsequent therapy</i>                                                                           |
| 1                                                                                                                 | 2005                                 | 1                               | Clarithromycin, lenalidomide and dexamethasone followed by lenalidomide maintenance                 |
| 2                                                                                                                 | 2006                                 | 3                               | Lenalidomide and dexamethasone                                                                      |
| 3                                                                                                                 | 2007                                 | 9                               | Samarium and bortezomib clinical trial                                                              |
| 4                                                                                                                 | 2007                                 | 3                               | Lenalidomide and dexamethasone                                                                      |
| 5                                                                                                                 | 2008                                 | 2                               | Lenalidomide and dexamethasone                                                                      |
| 6                                                                                                                 | 2008                                 | 1                               | Pomalidomide and dexamethasone                                                                      |
| 7                                                                                                                 | 2008                                 | 3                               | High-dose therapy with autologous stem cell transplant                                              |
| 8                                                                                                                 | 2008                                 | 4                               | High-dose therapy with autologous stem cell transplant                                              |
| 9                                                                                                                 | 2008                                 | 2                               | Cyclophosphamide and prednisone                                                                     |
| 10                                                                                                                | 2009                                 | 6                               | High-dose therapy with second autologous stem cell transplant                                       |
| 11                                                                                                                | 2009                                 | 5                               | Melphalan with high-dose steroid                                                                    |
| 12                                                                                                                | 2009                                 | 10                              | High-dose therapy with second autologous stem cell transplant                                       |
| 13                                                                                                                | 2009                                 | 2                               | Cyclophosphamide prednisone                                                                         |
| 14                                                                                                                | 2009                                 | 3                               | Pomalidomide and dexamethasone                                                                      |
| 15                                                                                                                | 2009                                 | 6                               | Carfilzomib with dexamethasone                                                                      |
| 16                                                                                                                | 2009                                 | 1                               | High-dose therapy with autologous stem cell transplant                                              |
| 17                                                                                                                | 2009                                 | 6                               | Bortezomib, cyclophosphamide and dexamethasone                                                      |
| 18                                                                                                                | 2009                                 | 2                               | Lenalidomide and dexamethasone                                                                      |
| 19                                                                                                                | 2010                                 | 4                               | Measles virus-NIS trial                                                                             |
| 20                                                                                                                | 2010                                 | 3                               | Pomalidomide and dexamethasone                                                                      |
| 21                                                                                                                | 2010                                 | 1                               | Pomalidomide and dexamethasone                                                                      |
| 22                                                                                                                | 2010                                 | 3                               | Pomalidomide and dexamethasone                                                                      |
| 23                                                                                                                | 2010                                 | 1                               | High-dose therapy with autologous stem cell transplant followed by bortezomib maintenance           |
| 24                                                                                                                | 2010                                 | 4                               | VDT-PACE                                                                                            |
| 25                                                                                                                | 2010                                 | 5                               | Pomalidomide and dexamethasone                                                                      |
| 26                                                                                                                | 2010                                 | 1                               | Bortezomib and dexamethasone followed by lenalidomide maintenance                                   |
| 27                                                                                                                | 2010                                 | 2                               | Bortezomib, cyclophosphamide and dexamethasone                                                      |
| 28                                                                                                                | 2010                                 | 3                               | Bortezomib and dexamethasone                                                                        |
| 29                                                                                                                | 2010                                 | 1                               | Bortezomib dexmethasone                                                                             |
| 30                                                                                                                | 2011                                 | 4                               | High-dose therapy with second autologous stem cell transplant followed by lenalidomide maintenance. |

|    |      |   |                                                                                                                                              |
|----|------|---|----------------------------------------------------------------------------------------------------------------------------------------------|
| 31 | 2011 | 2 | High-dose therapy with autologous stem cell transplant                                                                                       |
| 32 | 2011 | 2 | Bortezomib, cyclophosphamide and dexamethasone                                                                                               |
| 33 | 2011 | 1 | Lenalidomide and dexamethasone                                                                                                               |
| 34 | 2011 | 4 | Pomalidomide and dexamethasone                                                                                                               |
| 35 | 2011 | 3 | Pomalidomide and dexamethasone                                                                                                               |
| 36 | 2011 | 2 | Bortezomib, lenalidomide and dexamethasone                                                                                                   |
| 37 | 2011 | 4 | High-dose therapy with autologous stem cell transplant and bortezomib and lenalidomide maintenance                                           |
| 38 | 2011 | 1 | Bortezomib, lenalidomide and dexamethasone                                                                                                   |
| 39 | 2011 | 3 | Pomalidomide and dexamethasone                                                                                                               |
| 40 | 2012 | 2 | Lenalidomide and dexamethasone                                                                                                               |
| 41 | 2012 | 1 | Panabinstat with everolimus                                                                                                                  |
| 42 | 2012 | 3 | Pomalidomide, bortezomib and dexamethasone                                                                                                   |
| 43 | 2012 | 2 | Bortezomib, cyclophosphamide and dexamethasone                                                                                               |
| 44 | 2012 | 1 | CHOP with lenalidomide                                                                                                                       |
| 45 | 2012 | 2 | Ixazomib and dexamethasone                                                                                                                   |
| 46 | 2013 | 2 | High-dose therapy with autologous stem cell transplant followed by pomalidomide maintenance.                                                 |
| 47 | 2013 | 5 | Measles virus-NIS trial                                                                                                                      |
| 48 | 2013 | 9 | VDT-PACE followed by second autologous stem cell transplant                                                                                  |
| 49 | 2013 | 2 | Ixazomib and dexamethasone                                                                                                                   |
| 50 | 2013 | 1 | Pomalidomide, bortezomib and dexamethasone                                                                                                   |
| 51 | 2013 | 1 | Bortezomib, cyclophosphamide and dexamethasone followed by high-dose therapy with autologous stem cell transplant and bortezomib maintenance |
| 52 | 2013 | 1 | Bortezomib, cyclophosphamide and dexamethasone                                                                                               |
| 53 | 2013 | 3 | VDT-PACE                                                                                                                                     |
| 54 | 2013 | 3 | Pomalidomide dexamethasone                                                                                                                   |
| 55 | 2013 | 5 | Pomalidomide and dexamethasone                                                                                                               |
| 56 | 2013 | 6 | Allogeneic stem cell transplant                                                                                                              |
| 57 | 2014 | 4 | Carfilzomib, pomalidomide and dexamethasone.                                                                                                 |
| 58 | 2014 | 3 | VDT-PACE followed by autologous stem cell transplant and lenalidomide maintenance                                                            |
| 59 | 2014 | 1 | Bortezomib, melphalan and prednisone                                                                                                         |
| 60 | 2014 | 1 | Ixazomib and dexamethasone                                                                                                                   |
| 61 | 2014 | 1 | Carfilzomib and dexamethasone                                                                                                                |
| 62 | 2014 | 1 | Ixazomib and dexamethasone                                                                                                                   |
| 63 | 2014 | 3 | Oprozomib trial                                                                                                                              |
| 64 | 2014 | 2 | Pomalidomide, bortezomib and dexamethasone                                                                                                   |

|                                                                                                                                                                                                                     |      |   |                                                             |
|---------------------------------------------------------------------------------------------------------------------------------------------------------------------------------------------------------------------|------|---|-------------------------------------------------------------|
| 65                                                                                                                                                                                                                  | 2015 | 2 | Ixazomib,pomalidomide and dexamethasone                     |
| 66                                                                                                                                                                                                                  | 2015 | 4 | Oprozomib trial                                             |
| 67                                                                                                                                                                                                                  | 2015 | 3 | Bortezomib and dexamethasone                                |
| 68                                                                                                                                                                                                                  | 2015 | 1 | Pomalidomide and dexamethasone                              |
| 69                                                                                                                                                                                                                  | 2015 | 1 | Ixazomib,pomalidomide and dexamethasone                     |
| 70                                                                                                                                                                                                                  | 2016 | 1 | Ixazomib, cyclophosphamide and dexamethasone                |
| 71                                                                                                                                                                                                                  | 2016 | 1 | Carfilzomib, pomalidomide and dexamethasone                 |
| 72                                                                                                                                                                                                                  | 2016 | 1 | Bortezomib, cyclophosphamide and dexamethasone              |
| 73                                                                                                                                                                                                                  | 2016 | 1 | Daratumumab, pomalidomide and dexamethasone                 |
| 74                                                                                                                                                                                                                  | 2016 | 3 | Daratumumab, bortezomib, cyclophosphamide and dexamethasone |
| 75                                                                                                                                                                                                                  | 2016 | 4 | Daratumumab and CHOP                                        |
| 76                                                                                                                                                                                                                  | 2016 | 2 | Daratumumab, pomalidomide and dexamethasone                 |
| CHOP indicates cyclophosphamide, doxorubicin, vincristine and prednisone; and VDT-PACE, Total Therapy protocol with bortezomib, dexamethasone, thalidomide, cisplatin, doxorubicin, cyclophosphamide and etoposide. |      |   |                                                             |

| <b>Supplementary Table 5. Comparative analysis between patients with acquired del(17p) and controls for putative risk factors at diagnosis for acquiring del(17p).</b> |                            |
|------------------------------------------------------------------------------------------------------------------------------------------------------------------------|----------------------------|
| <i>Presumed risk factor for acquiring del (17p)</i>                                                                                                                    | <i>Odds ratio (95% CI)</i> |
| Age ≥65 years (28/76 vs. 51/152)                                                                                                                                       | 0.1.16 (0.65-2.05)         |
| ISS III stage (14/56 vs. 26/136)                                                                                                                                       | 1.41 (0.67-2.96)           |
| Elevated LDH (7/51 vs. 5/121)                                                                                                                                          | <b>3.69 (1.11-12.24)</b>   |
| Bone marrow plasma cell % ≥50% (21/70 vs. 62/150)                                                                                                                      | 0.61 (0.33-1.11)           |
| High plasma cell proliferative rate (14/45 vs. 22/106)                                                                                                                 | 0.72 (0.78-3.79)           |
| High-risk translocations (14/76 vs. 14/152)                                                                                                                            | <b>2.23 (1.00-4.95)</b>    |
| t(4;14) (12/76 vs. 10/152)                                                                                                                                             | <b>2.66 (1.09-6.48)</b>    |
| t(11;14) (15/76 vs. 37/152)                                                                                                                                            | 0.76 (0.39-1.50)           |
| Monosomy 13 (27/76 vs. 59/152)                                                                                                                                         | 0.86 (0.49-1.54)           |
| Any trisomy/tetrasomy (38/76 vs. 90/152)                                                                                                                               | 0.69 (0.40-1.20)           |
| Hyperdiploidy (trisomy/tetrasomy of ≥2 odd-numbered chromosomes) (32/76 vs. 69/152)                                                                                    | 0.87 (0.50-1.53)           |
| PI-containing induction (21/76 vs. 37/152)                                                                                                                             | 1.19 (0.64-2.22)           |
| Alkylating agent in induction (17/76 vs. 36/160)                                                                                                                       | 1.00 (0.52-1.94)           |
| Autologous SCT with high dose melphalan within 1 year of diagnosis (and before detection of del(17p) for cases) (33/76 vs. 82/152)                                     | 0.65 (0.38-1.14)           |
| ISS indicates international staging system; LDH, Lactate dehydrogenase; PI, Proteasome inhibitor; and SCT, stem cell transplantation.                                  |                            |



**Supplementary figure 1. Survival outcomes in patients with acquired del(17p)-** (a) Progression free survival and overall survival in patients with acquired del(17p) from detection of del(17p). The median PFS and OS were 5.4 months (95% CI, 2.7-7.7) and 18.1 months (95% CI, 11.9-25.0) respectively.

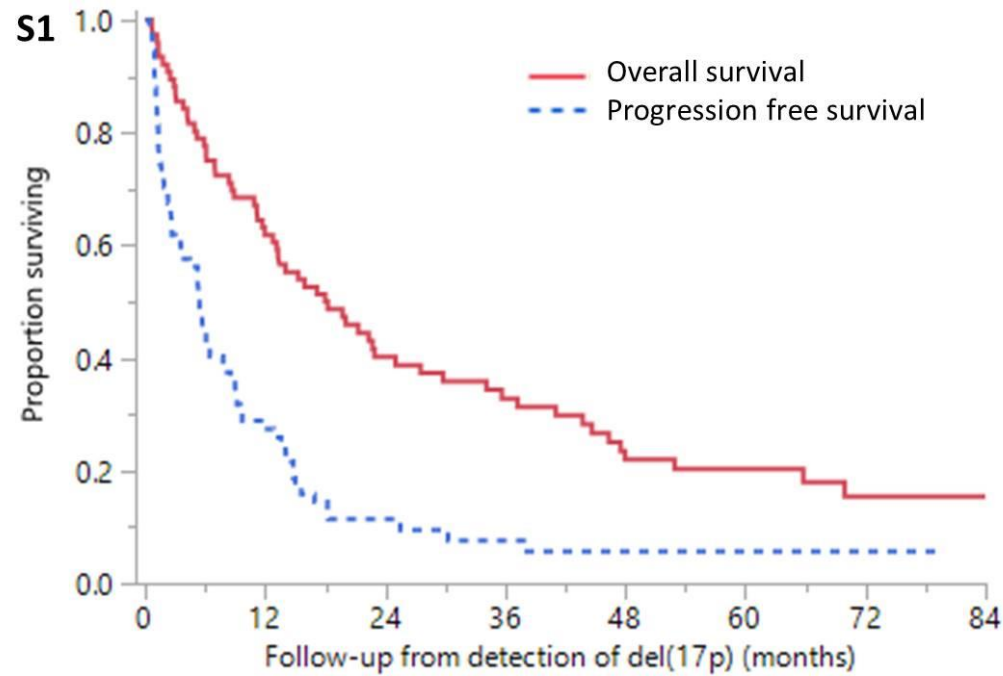

|     |    |    |    |    |    |    |   |   |
|-----|----|----|----|----|----|----|---|---|
| OS  | 76 | 47 | 28 | 22 | 14 | 11 | 5 | 3 |
| PFS | 76 | 19 | 7  | 4  | 2  | 1  | 1 | - |

**Supplementary figure 2. Landmark analysis for overall survival (OS) in patients with acquired del(17p) and controls-** OS was calculated from the date of detection of del(17p) for patients with acquired del(17p). For controls, OS was landmarked from a date corresponding to the time duration between diagnosis and detection of del(17p) for respective controls. The respective OS for patients with acquired del(17p) and controls were 18.1 months (95% CI, 11.1-25.0) and 56.2 months (95% CI, 44.4-79.7) ( $P < 0.001$ ).

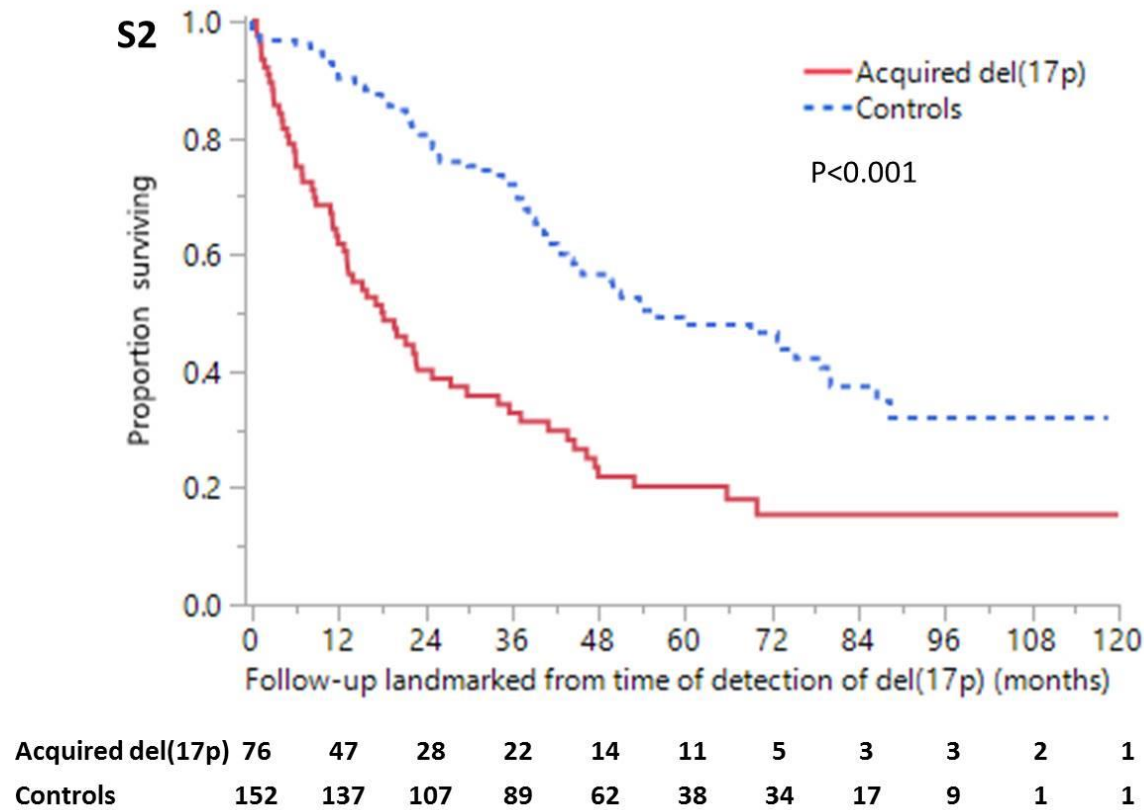

Supplement: ba028530-suppl1.pdf [file ba028530-suppl1.pdf]
